# Supplementary figures and images for: Synthesis of carbon nitride nanotubes with the C3N4 stoichiometry via a benzene-thermal process at low temperaturesElectronic Supplementary Information (ESI) available: XRD patterns. See http://www.rsc.org/suppdata/cc/b3/b311390f/
Source: Royal Society of Chemistry journal article supplement (doi:10.1039/b311390f), 2003-12-19

**Electronic Supplementary information:**


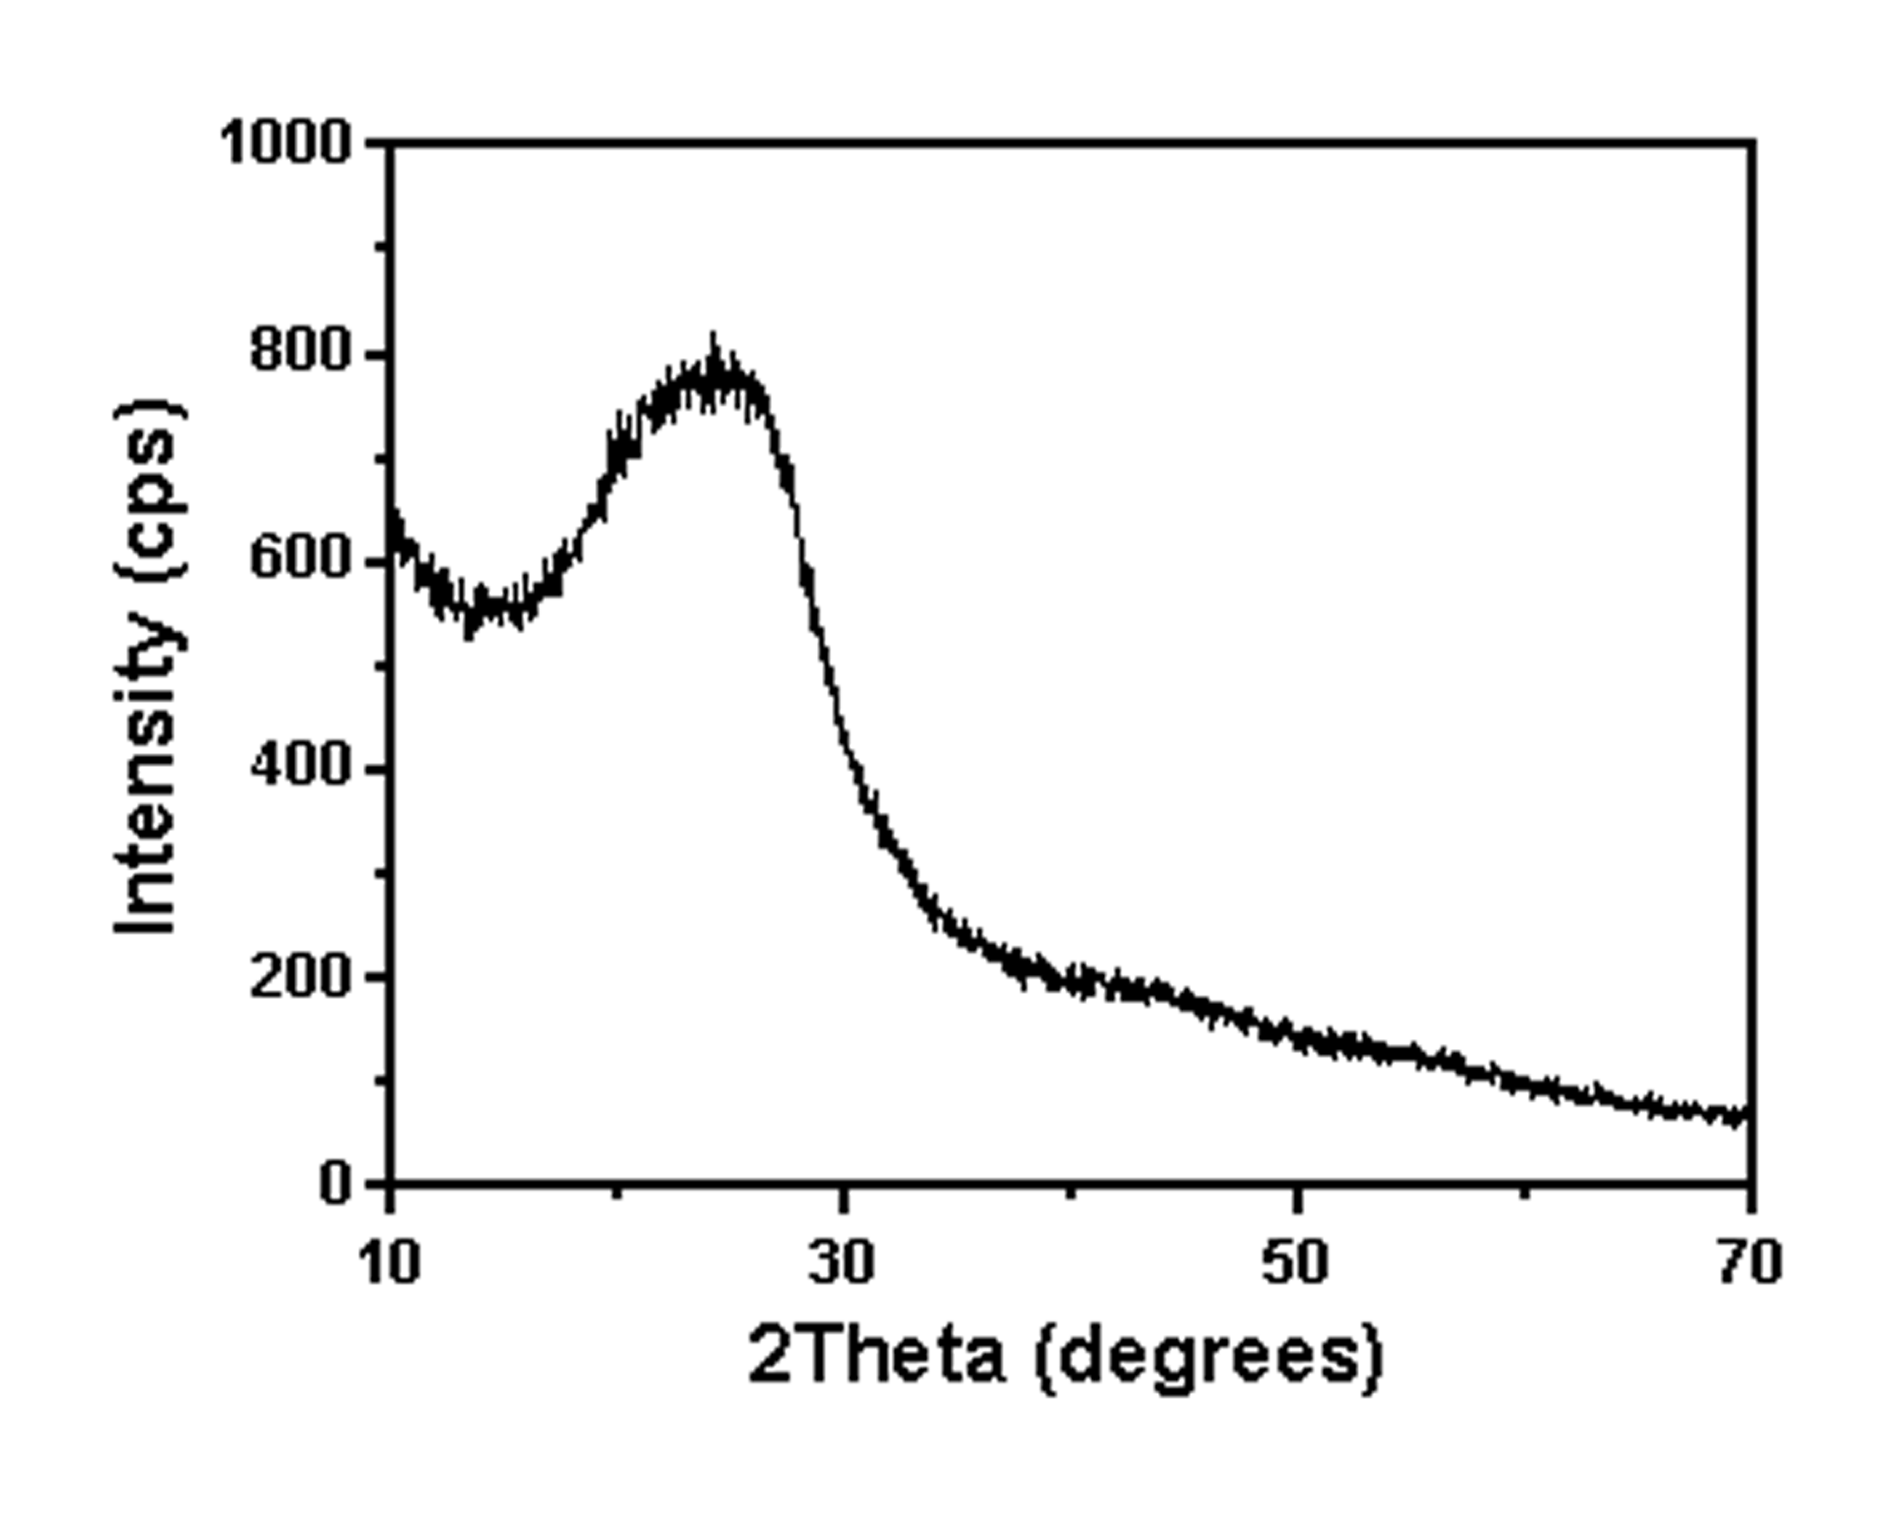


**ESI:** XRD patterns of the synthesized sample

Supplement: b311390f.doc [file b311390f.doc]
